# Supplementary material for: Workflow for practical quantum chemical calculations with a quantum phase estimation algorithm: electronic ground and π–π* excited states of benzene and its derivatives
Source: Royal Society of Chemistry journal article supplement (doi:10.1039/d4cp03454f), 2024-01-01
Supplement: d4cp03454f1.pdf [file d4cp03454f1.pdf]

ELECTRONIC SUPPLEMENTARY INFORMATION

## Workflow for practical quantum chemical calculations with quantum phase estimation algorithm: electronic ground and $\pi$ - $\pi^*$ excited states of benzene and its derivatives

Yusuke Ino\*<sup>†</sup>, Misaki Yonekawa<sup>†</sup>, Hideto Yuzawa<sup>†</sup>, Yuichiro Minato<sup>‡</sup>, and Kenji Sugisaki\*<sup>¶</sup>

<sup>†</sup>Fujifilm Corporation, 577 Ushijima, Kaisei-cho, Ashigarakami-gun, Kanagawa 258-8577, Japan,

<sup>‡</sup>blueqat Inc., 2-24-12-39F, Shibuya, Shibuya-ku, Tokyo 150-6139, Japan,

<sup>¶</sup>Graduate School of Science and Technology, Keio University, 7-1 Shinkawasaki, Saiwai-ku, Kawasaki, Kanagawa 212-0032, Japan; Quantum Computing Center, Keio University, 3-14-1 Hiyoshi, Kohoku-ku Yokohama, Kanagawa 223-8522, Japan; Keio University Sustainable Quantum Artificial Intelligence Center (KSQAIC), Keio University, 2-15-45 Mita, Minato-ku, Tokyo 108-8345, Japan; Centre for Quantum Engineering, Research and Education, TCG Centres for Research and Education in Science and Technology, Sector V, Salt Lake, Kolkata 700091, India

### 1. Cartesian coordinates of LiH, benzene, chlorobenzene, nitrobenzene

Table S.1.1 Cartesian coordinates of LiH molecule in the unit of  $\text{\AA}$ , optimized at the B3LYP/6-31+G(d) level of theory.

| Atom | x | y | z       |
|------|---|---|---------|
| H    | 0 | 0 | -1.1443 |
| Li   | 0 | 0 | 0.3814  |

Table S.1.2 Cartesian coordinates of benzene in the unit of  $\text{\AA}$ , optimized at the B3LYP/6-311G(d) level of theory.

| Atom | x       | y       | z      |
|------|---------|---------|--------|
| C    | 0.0000  | -1.3966 | 0.0000 |
| C    | -1.2095 | -0.6983 | 0.0000 |
| C    | 1.2095  | -0.6983 | 0.0000 |
| C    | 1.2095  | 0.6983  | 0.0000 |
| C    | -1.2095 | 0.6983  | 0.0000 |
| C    | 0.0000  | 1.3966  | 0.0000 |
| H    | 0.0000  | -2.4837 | 0.0000 |
| H    | 2.1509  | -1.2418 | 0.0000 |
| H    | 2.1509  | 1.2418  | 0.0000 |
| H    | -2.1509 | -1.2418 | 0.0000 |
| H    | -2.1509 | 1.2418  | 0.0000 |
| H    | 0.0000  | 2.4837  | 0.0000 |

Table S.1.3 Cartesian coordinates of chlorobenzene in the unit of  $\text{\AA}$ , optimized at the B3LYP/6-311G(d) level of theory.

| Atom | x      | y       | z       |
|------|--------|---------|---------|
| C    | 0.0000 | -1.2163 | -0.1783 |
| C    | 0.0000 | 0.0000  | 0.5034  |
| C    | 0.0000 | -1.2076 | -1.5743 |
| C    | 0.0000 | 0.0000  | -2.2745 |
| C    | 0.0000 | 1.2163  | -0.1783 |
| C    | 0.0000 | 1.2076  | -1.5743 |
| H    | 0.0000 | -2.1514 | -2.1128 |
| H    | 0.0000 | 0.0000  | -3.3607 |
| H    | 0.0000 | -2.1495 | 0.3749  |
| H    | 0.0000 | 2.1495  | 0.3749  |
| H    | 0.0000 | 2.1514  | -2.1128 |
| Cl   | 0.0000 | 0.0000  | 2.2644  |

Table S.1.4 Cartesian coordinates of nitrobenzene in the unit of  $\text{\AA}$ , optimized at the B3LYP/6-311G(d) level of theory.

| Atom | x      | y       | z       |
|------|--------|---------|---------|
| C    | 0.0000 | 0.0000  | -0.2450 |
| C    | 0.0000 | -1.2207 | 0.4278  |
| C    | 0.0000 | 1.2207  | 0.4278  |
| C    | 0.0000 | 1.2123  | 1.8209  |
| C    | 0.0000 | -1.2123 | 1.8209  |
| C    | 0.0000 | 0.0000  | 2.5164  |
| H    | 0.0000 | 2.1429  | -0.1400 |
| H    | 0.0000 | 2.1532  | 2.3631  |
| H    | 0.0000 | -2.1429 | -0.1400 |
| H    | 0.0000 | -2.1532 | 2.3631  |
| H    | 0.0000 | 0.0000  | 3.6028  |
| N    | 0.0000 | 0.0000  | -1.7179 |
| O    | 0.0000 | -1.0898 | -2.2898 |
| O    | 0.0000 | 1.0898  | -2.2898 |

2. Active orbitals used for the CAS-CI calculations of Benzene, Chlorobenzene, Nitrobenzene

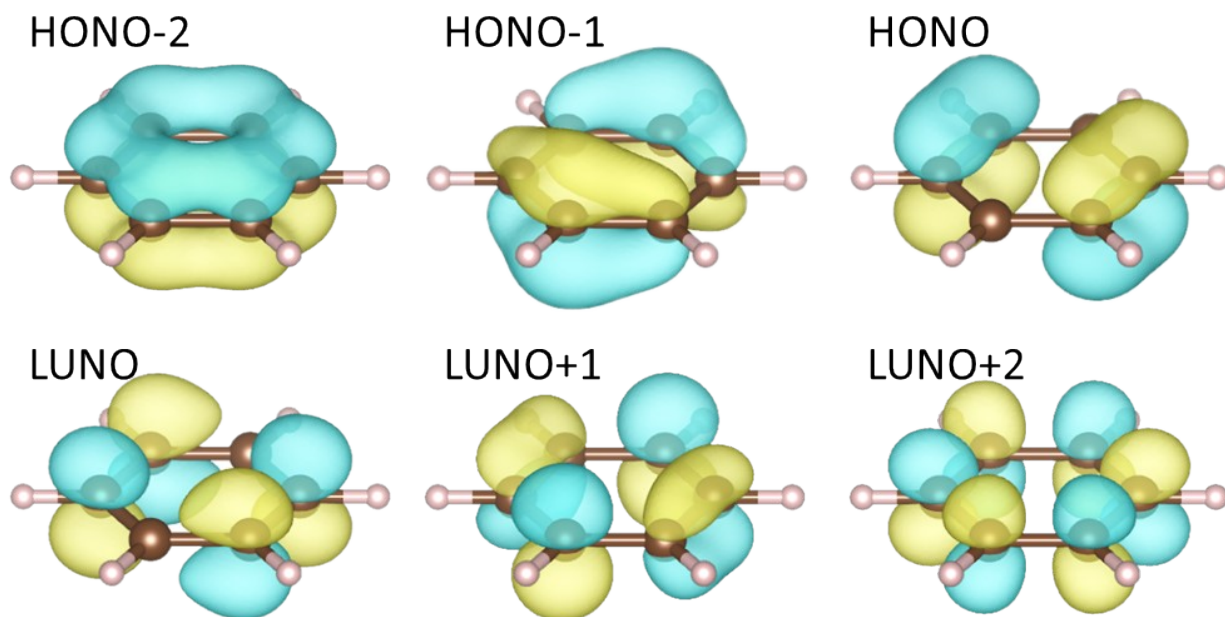

Figure S.2.1. Active orbitals used for the CAS-CI calculations of benzene. Label at the upper left of each orbital refers to the index of the pseudo-natural orbitals constructed from the MP2 calculation.

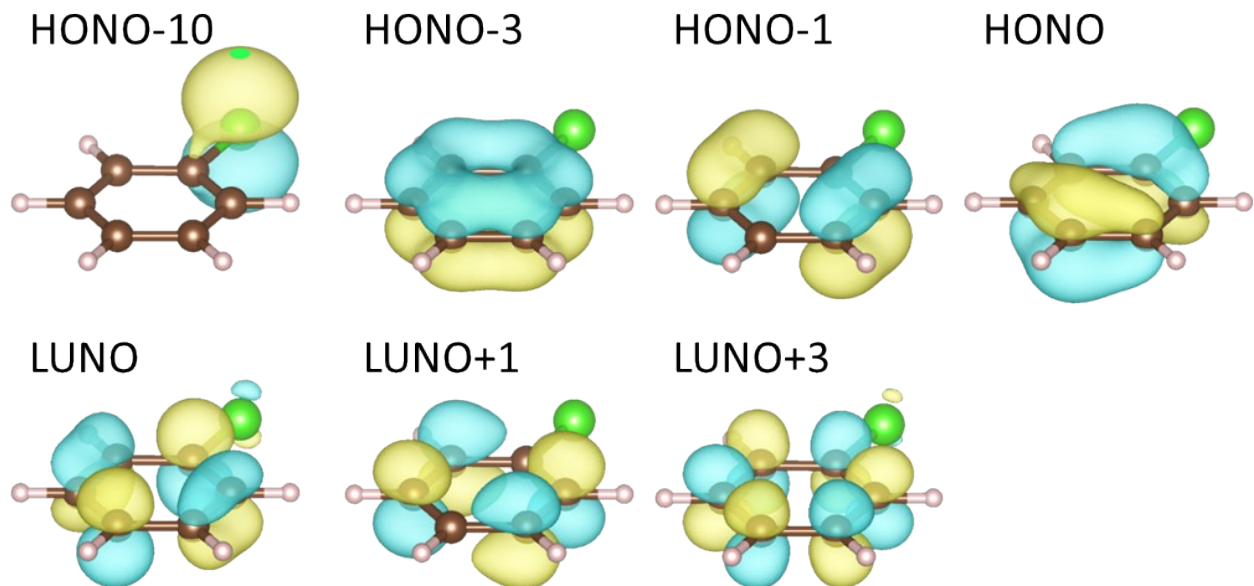

Figure S.2.2. Active orbitals used for the CAS-CI calculations of chlorobenzene. Label at the upper left of each orbital refers to the index of the pseudo-natural orbitals constructed from the MP2 calculation.

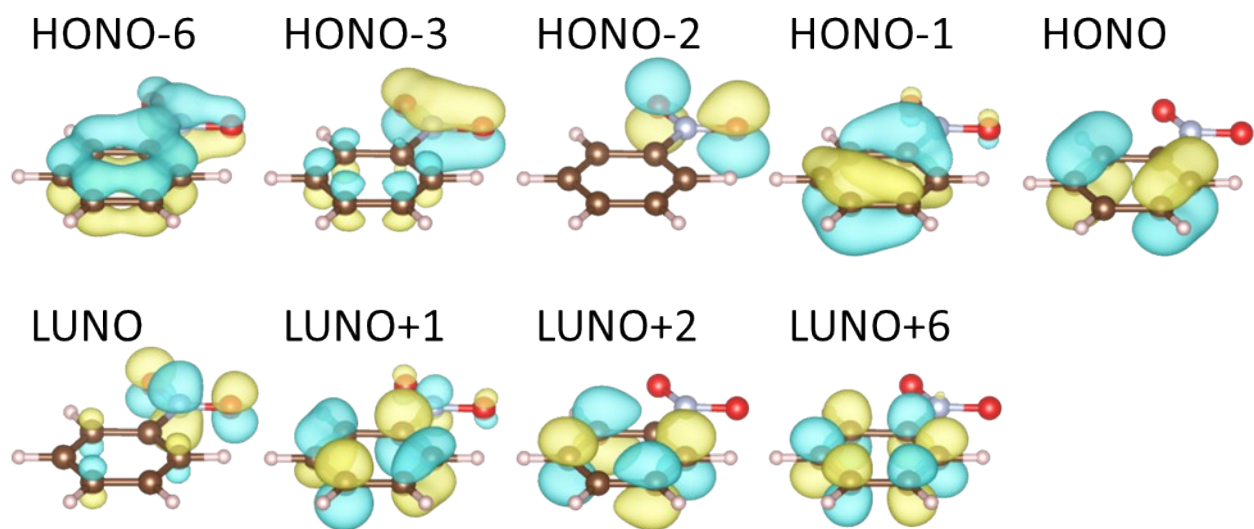

Figure S.2.3. Active orbitals used for the CAS-CI calculations of nitrobenzene. Label at the upper left of each orbital refers to the index of the pseudo-natural orbitals constructed from the MP2 calculation.

### 3. Details of quantum phase estimation

Table S.3.1 The detail of Hamiltonian and quantum phase estimation for LiH.

|                                                              |      |      |       |       |       |
|--------------------------------------------------------------|------|------|-------|-------|-------|
| Number of qubits                                             | 13   | 15   | 17    | 19    | 21    |
| Number of electrons                                          | 4    | 4    | 4     | 4     | 4     |
| Number of atoms                                              | 2    | 2    | 2     | 2     | 2     |
| Number of active spin-orbitals                               | 12   | 14   | 16    | 18    | 20    |
| Number of one-electron integrals                             | 36   | 54   | 76    | 78    | 80    |
| Number of two-electron integrals                             | 1824 | 3732 | 6944  | 9012  | 11168 |
| Number of quantum gates (for determining the whole 4 digits) | 3888 | 9348 | 19684 | 26304 | 33884 |

Table S.3.2 The detail of Hamiltonian and quantum phase estimation for benzene, chlorobenzene, nitrobenzene

|                                                               | Benzene | Chlorobenzene | Nitrobenzene |
|---------------------------------------------------------------|---------|---------------|--------------|
| Number of electrons                                           | 42      | 58            | 64           |
| Number of atoms                                               | 12      | 12            | 14           |
| Number of active spin-orbitals                                | 12      | 14            | 18           |
| Number of one-electron integrals                              | 16      | 58            | 90           |
| Number of two-electron integrals                              | 1184    | 4964          | 23284        |
| Number of qubits                                              | 13      | 15            | 19           |
| Number of quantum gates (for determining the whole 10 digits) | 2420    | 12624         | 42156        |

4. Quantum Circuits used for the preparation of the excited state approximate wave function.

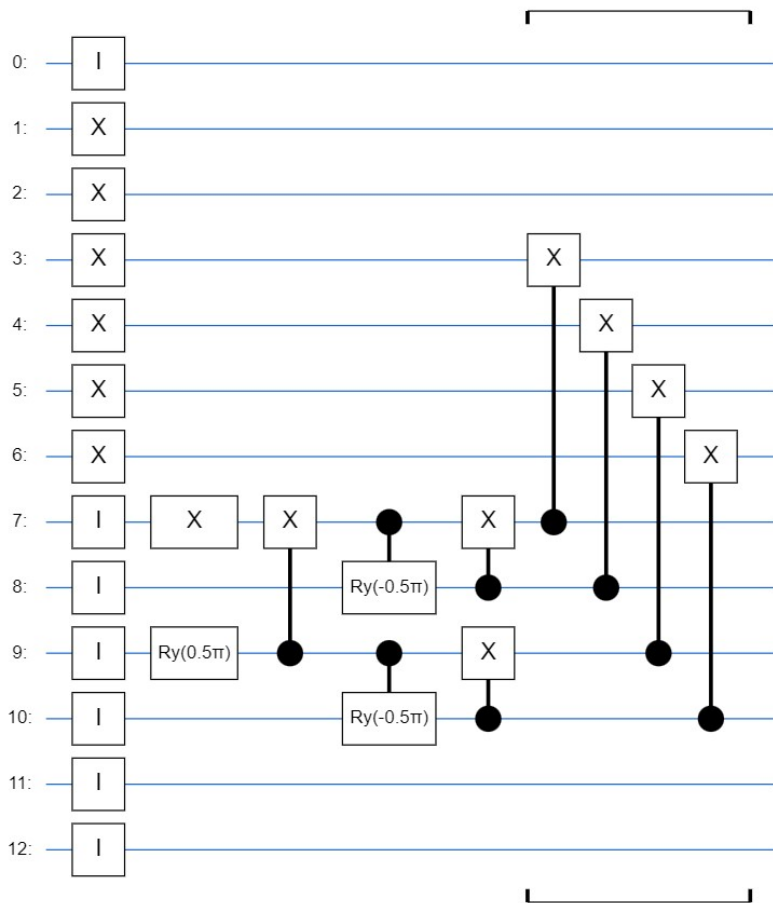

Figure S.4.1 Quantum circuit used for the preparation of the excited state approximate wave function of benzene.

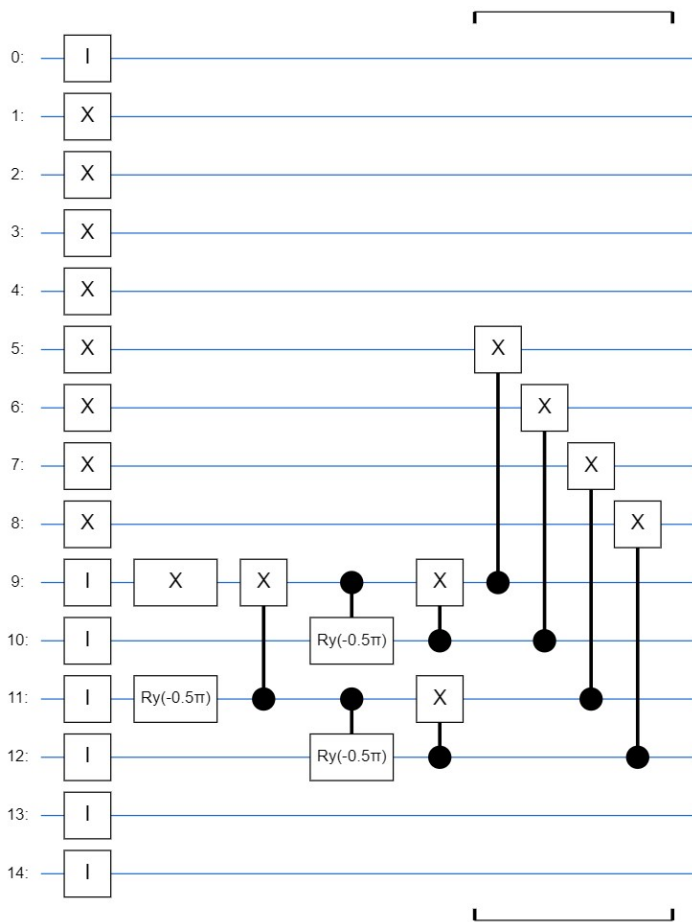

Figure S.4.2 Quantum circuit used for the preparation of the excited state approximate wave function of chlorobenzene.

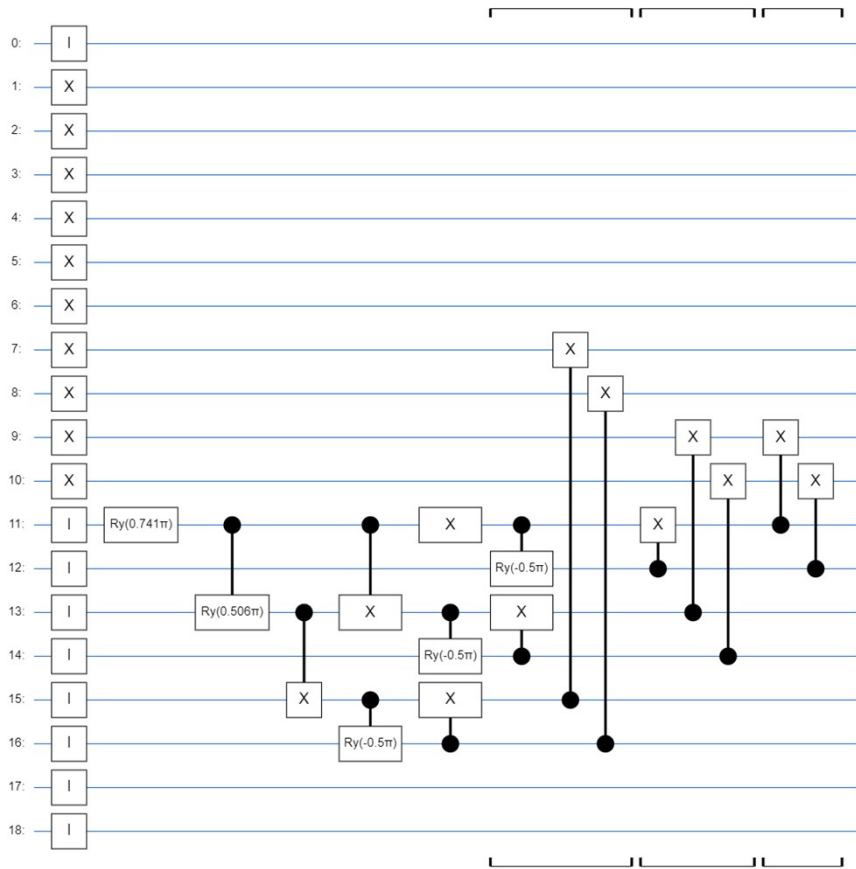

Figure S.4.3 Quantum circuit used for the preparation of the excited state approximate wave function of benzene.
